# Supplementary material for: Packing of tetrahedral EX4 molecules with E = C, Si, Ge, Sn, Pb and X = F, Cl, Br, I
Source: Royal Society of Chemistry journal article supplement (doi:10.1039/b805504a), 2008-01-01
Supplement: b805504a.pdf [file b805504a.pdf]

## Packing of tetrahedral $EX_4$ molecules with $E = \text{C, Si, Ge, Sn, Pb}$ and $X = \text{F, Cl, Br, I}$

Alexandra Kerstin Wolf, Jürgen Glinnemann, Martin Ulrich Schmidt\*

Institut für Anorganische und Analytische Chemie, Johann Wolfgang Goethe-Universität, Max-von-Laue-Str. 7, D-60438 Frankfurt am Main, Germany.

\* [m.schmidt@chemie.uni-frankfurt.de](mailto:m.schmidt@chemie.uni-frankfurt.de)

### 1 Bond-length Terms

**Table 1:** Bond-length terms

| $EX_4$            | value /Å |
|-------------------|----------|
| CF <sub>4</sub>   | 1.3290   |
| CCl <sub>4</sub>  | 1.7500   |
| CBr <sub>4</sub>  | 1.9125   |
| CI <sub>4</sub>   | 2.1540   |
| SiF <sub>4</sub>  | 1.5850   |
| SiCl <sub>4</sub> | 2.0080   |
| SiBr <sub>4</sub> | 2.2500   |
| SiI <sub>4</sub>  | 2.4300   |
| GeF <sub>4</sub>  | 1.7330   |
| GeCl <sub>4</sub> | 2.0950   |
| GeBr <sub>4</sub> | 2.2670   |
| GeI <sub>4</sub>  | 2.5700   |
| SnF <sub>4</sub>  | 1.8500   |
| SnCl <sub>4</sub> | 2.2800   |
| SnBr <sub>4</sub> | 2.4100   |
| SnI <sub>4</sub>  | 2.6500   |
| PbF <sub>4</sub>  | 1.9500   |
| PbCl <sub>4</sub> | 2.3620   |
| PbBr <sub>4</sub> | 2.5300   |
| PbI <sub>4</sub>  | 2.7700   |

## 2 Calculated polymorphs for all EX<sub>4</sub> compounds

**Table 2:** Calculated polymorphs for CF<sub>4</sub>

| Space group                       | Z  | Site sym.   | E/(kJ/mol) | a/Å    | b/Å   | c/Å    | α/° | β/°    | γ/° |
|-----------------------------------|----|-------------|------------|--------|-------|--------|-----|--------|-----|
| <i>C2/c</i>                       | 4  | 2           | -23.225    | 8.711  | 4.316 | 8.323  | 90  | 117.82 | 90  |
| <i>I</i> $\bar{4}2m$              | 2  | $\bar{4}2m$ | -23.160    | 4.341  | 4.341 | 7.436  | 90  | 90     | 90  |
| <i>P2</i> <sub>1</sub> / <i>c</i> | 4  | 1           | -22.882    | 7.572  | 4.899 | 7.643  | 90  | 101.38 | 90  |
| <i>Pa</i> $\bar{3}$               | 8  | 3           | -22.480    | 8.229  | 8.229 | 8.229  | 90  | 90     | 90  |
| <i>C2/c</i>                       | 32 | all on 1    | -22.128    | 16.659 | 9.106 | 16.365 | 90  | 113.66 | 90  |
| <i>P</i> $\bar{4}3m$              | 1  | $\bar{4}3m$ | -19.116    | 4.267  | 4.267 | 4.267  | 90  | 90     | 90  |

**Table 3:** Calculated polymorphs for CCl<sub>4</sub>

| Space group                         | Z  | Site sym.   | E/(kJ/mol) | a/Å    | b/Å    | c/Å    | α/° | β/°    | γ/° |
|-------------------------------------|----|-------------|------------|--------|--------|--------|-----|--------|-----|
| <i>Pa</i> $\bar{3}$                 | 8  | 3           | -51.508    | 9.875  | 9.875  | 9.875  | 90  | 90     | 90  |
| <i>P2</i> <sub>1</sub> / <i>c</i>   | 4  | 1           | -51.468    | 9.065  | 5.988  | 9.084  | 90  | 102.29 | 90  |
| <i>C2/c</i>                         | 4  | 2           | -51.059    | 10.664 | 5.122  | 10.015 | 90  | 118    | 90  |
| <i>I</i> $\bar{4}2m$                | 2  | $\bar{4}2m$ | -50.402    | 5.123  | 5.123  | 9.287  | 90  | 90     | 90  |
| <i>P4</i> <sub>2</sub> / <i>nmc</i> | 2  | $\bar{4}2m$ | -49.596    | 6.907  | 6.907  | 5.122  | 90  | 90     | 90  |
| <i>C2/c</i>                         | 32 | all on 1    | -49.004    | 20.262 | 10.978 | 19.664 | 90  | 114.71 | 90  |
| <i>P</i> $\bar{4}3m$                | 1  | $\bar{4}3m$ | -45.384    | 5.044  | 5.044  | 5.044  | 90  | 90     | 90  |

**Table 4:** Calculated polymorphs for CBr<sub>4</sub>

| Space group                         | Z  | Site sym.            | E/(kJ/mol) | a/Å    | b/Å    | c/Å    | α/° | β/°    | γ/° |
|-------------------------------------|----|----------------------|------------|--------|--------|--------|-----|--------|-----|
| <i>Pa</i> $\bar{3}$                 | 8  | 3                    | -60.760    | 10.138 | 10.138 | 10.138 | 90  | 90     | 90  |
| <i>P2</i> <sub>1</sub> / <i>c</i>   | 4  | 1                    | -60.596    | 9.284  | 6.181  | 9.289  | 90  | 101.95 | 90  |
| <i>C2</i> / <i>c</i>                | 4  | 2                    | -60.188    | 11.080 | 5.196  | 10.210 | 90  | 117.35 | 90  |
| <i>I</i> $\bar{4}$ 2 <i>m</i>       | 2  | $\bar{4}$ 2 <i>m</i> | -59.584    | 5.190  | 5.190  | 9.745  | 90  | 90     | 90  |
| <i>P</i> $\bar{1}$                  | 2  | 1                    | -59.580    | 6.150  | 6.194  | 7.236  | 90  | 105.01 | 90  |
| <i>P4</i> <sub>2</sub> / <i>nmc</i> | 2  | $\bar{4}$ 2 <i>m</i> | -59.300    | 7.098  | 7.098  | 5.200  | 90  | 90     | 90  |
| <i>C2</i> / <i>c</i>                | 32 | all on 1             | -57.004    | 20.929 | 11.285 | 20.256 | 90  | 115.25 | 90  |
| <i>P</i> $\bar{4}$ 3 <i>m</i>       | 1  | $\bar{4}$ 3 <i>m</i> | -56.128    | 5.119  | 5.119  | 5.119  | 90  | 90     | 90  |

**Table 5:** Calculated polymorphs for Cl<sub>4</sub>

| Space group                         | Z  | Site sym.            | E/(kJ/mol) | a/Å    | b/Å    | c/Å    | α/°   | β/°    | γ/°   |
|-------------------------------------|----|----------------------|------------|--------|--------|--------|-------|--------|-------|
| <i>C2</i> / <i>c</i>                | 4  | 2                    | -78.068    | 11.948 | 5.526  | 10.880 | 90    | 116.92 | 90    |
| <i>P2</i> <sub>1</sub> / <i>c</i>   | 4  | 1                    | -77.669    | 9.935  | 6.616  | 9.962  | 90    | 101.57 | 90    |
| <i>I</i> $\bar{4}$ 2 <i>m</i>       | 2  | $\bar{4}$ 2 <i>m</i> | -77.392    | 5.518  | 5.518  | 10.553 | 90    | 90     | 90    |
| <i>P4</i> <sub>2</sub> / <i>nmc</i> | 2  | $\bar{4}$ 2 <i>m</i> | -77.348    | 7.605  | 7.605  | 5.545  | 90    | 90     | 90    |
| <i>Pa</i> $\bar{3}$                 | 8  | 3                    | -76.896    | 10.869 | 10.869 | 10.869 | 90    | 90     | 90    |
| <i>P</i> $\bar{4}$ 3 <i>m</i>       | 1  | $\bar{4}$ 3 <i>m</i> | -74.060    | 5.448  | 5.448  | 5.448  | 90    | 90     | 90    |
| <i>P</i> $\bar{1}$                  | 2  | 1                    | -72.926    | 6.633  | 7.269  | 7.803  | 75.28 | 89.78  | 63.99 |
| <i>C2</i> / <i>c</i>                | 32 | all on 1             | -72.396    | 22.449 | 12.078 | 21.811 | 90    | 225.45 | 90    |

**Table 6:** Calculated polymorphs for SiF<sub>4</sub>

| Space group                       | Z  | Site sym.            | E/(kJ/mol) | a/Å    | b/Å   | c/Å    | α/° | β/°    | γ/° |
|-----------------------------------|----|----------------------|------------|--------|-------|--------|-----|--------|-----|
| <i>C2/c</i>                       | 4  | 2                    | -51.359    | 8.871  | 4.392 | 8.301  | 90  | 116.14 | 90  |
| <i>I</i> $\bar{4}$ 2 <i>m</i>     | 2  | $\bar{4}$ 2 <i>m</i> | -51.180    | 4.487  | 4.487 | 7.385  | 90  | 90     | 90  |
| <i>I</i> $\bar{4}$ 3 <i>m</i>     | 2  | $\bar{4}$ 3 <i>m</i> | -50.492    | 5.530  | 5.530 | 5.530  | 90  | 90     | 90  |
| <i>P2</i> <sub>1</sub> / <i>c</i> | 4  | 1                    | -46.884    | 7.659  | 4.872 | 8.141  | 90  | 97.69  | 90  |
| <i>C2/c</i>                       | 32 | all on 1             | -43.852    | 16.801 | 9.478 | 16.635 | 90  | 110.03 | 90  |
| <i>Pa</i> $\bar{3}$               | 8  | 3                    | -42.588    | 8.418  | 8.418 | 8.418  | 90  | 90     | 90  |
| <i>P</i> $\bar{4}$ 3 <i>m</i>     | 1  | $\bar{4}$ 3 <i>m</i> | -38.484    | 4.311  | 4.311 | 4.311  | 90  | 90     | 90  |

**Table 7:** Calculated polymorphs for SiCl<sub>4</sub>

| Space group                       | Z  | Site sym.            | E/(kJ/mol) | a/Å    | b/Å    | c/Å    | α/°   | β/°    | γ/°   |
|-----------------------------------|----|----------------------|------------|--------|--------|--------|-------|--------|-------|
| <i>C2/c</i>                       | 4  | 2                    | -73.429    | 10.989 | 5.168  | 10.066 | 90    | 116.78 | 90    |
| <i>I</i> $\bar{4}$ 2 <i>m</i>     | 2  | $\bar{4}$ 2 <i>m</i> | -72.346    | 5.177  | 5.177  | 9.587  | 90    | 90     | 90    |
| <i>P2</i> <sub>1</sub> / <i>c</i> | 4  | 1                    | -70.583    | 9.244  | 6.066  | 9.355  | 90    | 100.64 | 90    |
| <i>Pa</i> $\bar{3}$               | 8  | 3                    | -68.120    | 10.099 | 10.099 | 10.099 | 90    | 90     | 90    |
| <i>R3c</i>                        | 6  | 1                    | -66.336    | 9.168  | 9.168  | 11.665 | 90    | 90     | 120   |
| <i>C2/c</i>                       | 32 | all on 1             | -65.760    | 20.733 | 11.194 | 20.390 | 90    | 114.75 | 90    |
| <i>P</i> $\bar{4}$ 3 <i>m</i>     | 1  | $\bar{4}$ 3 <i>m</i> | -65.236    | 5.078  | 5.078  | 5.078  | 90    | 90     | 90    |
| <i>P</i> $\bar{1}$                | 2  | 1                    | -59.908    | 6.087  | 6.198  | 7.390  | 90.14 | 105.82 | 98.58 |

**Table 8:** Calculated polymorphs for SiBr<sub>4</sub>

| Space group                   | Z  | Site sym.   | E/(kJ/mol) | a/Å    | b/Å    | c/Å    | α/° | β/°    | γ/° |
|-------------------------------|----|-------------|------------|--------|--------|--------|-----|--------|-----|
| <i>C2/c</i>                   | 4  | 2           | -81.204    | 11.523 | 5.294  | 10.423 | 90  | 116.66 | 90  |
| $\bar{I}4_2m$                 | 2  | $\bar{4}2m$ | -79.904    | 5.289  | 5.289  | 10.199 | 90  | 90     | 90  |
| <i>P2<sub>1</sub>/c</i>       | 4  | 1           | -78.716    | 9.563  | 6.317  | 9.656  | 90  | 100.72 | 90  |
| <i>Pa<math>\bar{3}</math></i> | 8  | 3           | -76.512    | 10.456 | 10.456 | 10.456 | 90  | 90     | 90  |
| $\bar{P}4_3m$                 | 1  | $\bar{4}3m$ | -74.280    | 5.248  | 5.248  | 5.248  | 90  | 90     | 90  |
| <i>R3c</i>                    | 6  | 1           | -74.136    | 9.322  | 9.322  | 12.199 | 90  | 90     | 120 |
| <i>Pban</i>                   | 2  | 222         | -73.896    | 10.328 | 5.272  | 5.272  | 90  | 90     | 90  |
| <i>C2/c</i>                   | 32 | all on 1    | -72.364    | 21.710 | 11.527 | 21.356 | 90  | 116.13 | 90  |

**Table 9:** Calculated polymorphs for SiI<sub>4</sub>

| Space group                   | Z  | Site sym.   | E/(kJ/mol) | a/Å    | b/Å    | c/Å    | α/° | β/°    | γ/° |
|-------------------------------|----|-------------|------------|--------|--------|--------|-----|--------|-----|
| <i>C2/c</i>                   | 4  | 2           | -89.247    | 12.499 | 5.574  | 11.165 | 90  | 116.53 | 90  |
| <i>C2/m</i>                   | 4  | m           | -85.200    | 13.696 | 7.903  | 6.845  | 90  | 109.43 | 90  |
| $\bar{P}4_3m$                 | 1  | $\bar{4}3m$ | -85.032    | 5.589  | 5.589  | 5.589  | 90  | 90     | 90  |
| <i>Pa<math>\bar{3}</math></i> | 8  | 3           | -85.012    | 11.170 | 11.170 | 11.170 | 90  | 90     | 90  |
| $\bar{I}4_2m$                 | 2  | $\bar{4}2m$ | -84.960    | 5.582  | 5.582  | 11.187 | 90  | 90     | 90  |
| <i>P4<sub>2</sub>/nmc</i>     | 2  | $\bar{4}2m$ | -84.956    | 7.910  | 7.910  | 5.570  | 90  | 90     | 90  |
| <i>P2<sub>1</sub>/c</i>       | 4  | 1           | -84.392    | 10.225 | 6.841  | 10.200 | 90  | 101.20 | 90  |
| <i>C2/c</i>                   | 32 | all on 1    | -77.480    | 23.402 | 12.366 | 22.728 | 90  | 117.11 | 90  |

**Table 10:** Calculated polymorphs for GeF<sub>4</sub>

| Space group                        | Z  | Site sym.   | E/(kJ/mol) | a/Å    | b/Å   | c/Å    | α/°   | β/°    | γ/°   |
|------------------------------------|----|-------------|------------|--------|-------|--------|-------|--------|-------|
| <i>I</i> $\bar{4}3m$               | 2  | $\bar{4}3m$ | -86.860    | 5.697  | 5.697 | 5.697  | 90    | 90     | 90    |
| <i>C</i> 2/ <i>c</i>               | 4  | 2           | -79.880    | 9.019  | 4.499 | 8.452  | 90    | 116.77 | 90    |
| <i>P</i> 2 <sub>1</sub> / <i>c</i> | 4  | 1           | -73.568    | 7.686  | 4.937 | 8.637  | 90    | 96.60  | 90    |
| <i>P</i> $\bar{1}$                 | 16 | 1           | -68.324    | 9.664  | 9.676 | 16.575 | 85.26 | 82     | 68.06 |
| <i>C</i> 2/ <i>c</i>               | 32 | all on 1    | -67.412    | 17.332 | 9.727 | 17.264 | 90    | 107.56 | 90    |
| <i>P</i> a $\bar{3}$               | 8  | 3           | -65.504    | 8.537  | 8.537 | 8.537  | 90    | 90     | 90    |
| <i>P</i> $\bar{4}3m$               | 1  | $\bar{4}3m$ | -49.152    | 4.394  | 4.394 | 4.394  | 90    | 90     | 90    |

**Table 11:** Calculated polymorphs for GeCl<sub>4</sub>

| Space group                        | Z  | Site sym.   | E/(kJ/mol) | a/Å    | b/Å    | c/Å    | α/° | β/°    | γ/° |
|------------------------------------|----|-------------|------------|--------|--------|--------|-----|--------|-----|
| <i>C</i> 2/ <i>c</i>               | 4  | 2           | -82.033    | 11.048 | 5.199  | 10.114 | 90  | 116.77 | 90  |
| <i>I</i> $\bar{4}2m$               | 2  | $\bar{4}2m$ | -80.388    | 5.211  | 5.211  | 9.624  | 90  | 90     | 90  |
| <i>P</i> 2 <sub>1</sub> / <i>c</i> | 4  | 1           | -78.184    | 9.289  | 6.077  | 9.465  | 90  | 100.41 | 90  |
| <i>R</i> 3 <i>c</i>                | 6  | 1           | -77.412    | 9.211  | 9.211  | 11.715 | 90  | 90     | 120 |
| <i>P</i> a $\bar{3}$               | 8  | 3           | -74.652    | 10.157 | 10.157 | 10.157 | 90  | 90     | 90  |
| <i>C</i> 2/ <i>c</i>               | 32 | all on 1    | -72.344    | 20.849 | 11.255 | 20.571 | 90  | 114.54 | 90  |
| <i>P</i> $\bar{4}3m$               | 1  | $\bar{4}3m$ | -70.872    | 5.108  | 5.108  | 5.108  | 90  | 90     | 90  |

**Table 12:** Calculated polymorphs for GeBr<sub>4</sub>

| Space group                       | Z  | Site sym.            | E/(kJ/mol) | a/Å    | b/Å    | c/Å    | α/° | β/°    | γ/° |
|-----------------------------------|----|----------------------|------------|--------|--------|--------|-----|--------|-----|
| <i>C2/c</i>                       | 4  | 2                    | -89.530    | 11.463 | 15.300 | 10.401 | 90  | 116.71 | 90  |
| <i>I</i> $\bar{4}$ 2 <i>m</i>     | 2  | $\bar{4}$ 2 <i>m</i> | -87.712    | 5.299  | 5.299  | 10.106 | 90  | 90     | 90  |
| <i>P2</i> <sub>1</sub> / <i>c</i> | 4  | 1                    | -86.411    | 9.540  | 6.281  | 9.674  | 90  | 100.57 | 90  |
| <i>R3c</i>                        | 6  | 1                    | -83.873    | 9.304  | 9.304  | 12.139 | 90  | 90     | 120 |
| <i>Pa</i> $\bar{3}$               | 8  | 3                    | -83.428    | 10.432 | 10.432 | 10.432 | 90  | 90     | 90  |
| <i>Pban</i>                       | 2  | 222                  | -80.208    | 10.276 | 5.279  | 5.279  | 90  | 90     | 90  |
| <i>P</i> $\bar{4}$ 3 <i>m</i>     | 1  | $\bar{4}$ 3 <i>m</i> | -79.596    | 5.249  | 5.249  | 5.249  | 90  | 90     | 90  |
| <i>C2/c</i>                       | 32 | all on 1             | -79.380    | 21.624 | 11.493 | 21.329 | 90  | 115.86 | 90  |

**Table 13:** Calculated polymorphs for GeI<sub>4</sub>

| Space group                       | Z  | Site sym.            | E/(kJ/mol) | a/Å    | b/Å    | c/Å    | α/° | β/°    | γ/° |
|-----------------------------------|----|----------------------|------------|--------|--------|--------|-----|--------|-----|
| <i>C2/c</i>                       | 4  | 2                    | -88.072    | 12.694 | 5.645  | 11.325 | 90  | 116.40 | 90  |
| <i>P2</i> <sub>1</sub> / <i>c</i> | 4  | 1                    | -87.284    | 10.361 | 6.906  | 10.363 | 90  | 100.94 | 90  |
| <i>I</i> $\bar{4}$ 2 <i>m</i>     | 2  | $\bar{4}$ 2 <i>m</i> | -87.280    | 5.691  | 5.691  | 11.310 | 90  | 90     | 90  |
| <i>Pa</i> $\bar{3}$               | 8  | 3                    | -87.232    | 11.317 | 11.317 | 11.317 | 90  | 90     | 90  |
| <i>P</i> $\bar{4}$ 3 <i>m</i>     | 1  | $\bar{4}$ 3 <i>m</i> | -85.036    | 5.711  | 5.711  | 5.711  | 90  | 90     | 90  |
| <i>C2/m</i>                       | 4  | m                    | -81.919    | 14.013 | 8.098  | 6.937  | 90  | 109.31 | 90  |
| <i>C2/c</i>                       | 32 | all on 1             | -79.976    | 23.801 | 12.397 | 23.348 | 90  | 117.99 | 90  |
| <i>Cc</i>                         | 4  | 1                    | -78.696    | 10.416 | 10.166 | 7.271  | 90  | 96.29  | 90  |

**Table 14:** Calculated polymorphs for SnF<sub>4</sub>

| Space group                       | Z  | Site sym.            | E/(kJ/mol) | a/Å    | b/Å   | c/Å    | α/° | β/°    | γ/° |
|-----------------------------------|----|----------------------|------------|--------|-------|--------|-----|--------|-----|
| <i>C2/c</i>                       | 4  | 2                    | -58.461    | 9.552  | 4.561 | 8.746  | 90  | 116.25 | 90  |
| <i>I</i> $\bar{4}$ 2 <i>m</i>     | 2  | $\bar{4}$ 2 <i>m</i> | -56.540    | 4.565  | 4.565 | 8.325  | 90  | 90     | 90  |
| <i>P2</i> <sub>1</sub> / <i>c</i> | 4  | 1                    | -53.622    | 8.111  | 5.234 | 8.385  | 90  | 98.28  | 90  |
| <i>R3c</i>                        | 6  | 1                    | -53.233    | 7.880  | 7.880 | 10.444 | 90  | 90     | 120 |
| <i>Pa</i> $\bar{3}$               | 8  | 3                    | -50.288    | 8.878  | 8.878 | 8.878  | 90  | 90     | 90  |
| <i>C2/c</i>                       | 32 | all on 1             | -49.218    | 18.380 | 9.738 | 18.143 | 90  | 114.65 | 90  |
| <i>P</i> $\bar{4}$ 3 <i>m</i>     | 1  | $\bar{4}$ 3 <i>m</i> | -46.380    | 4.487  | 4.487 | 4.487  | 90  | 90     | 90  |

**Table 15:** Calculated polymorphs for SnCl<sub>4</sub>

| Space group                               | Z  | Site sym.            | E/(kJ/mol) | a/Å    | b/Å    | c/Å    | α/°   | β/°    | γ/°   |
|-------------------------------------------|----|----------------------|------------|--------|--------|--------|-------|--------|-------|
| <i>C2/c</i>                               | 4  | 2                    | -73.525    | 11.636 | 5.242  | 10.423 | 90    | 116.55 | 90    |
| <i>I</i> $\bar{4}$ 2 <i>m</i>             | 2  | $\bar{4}$ 2 <i>m</i> | -73.068    | 5.241  | 5.241  | 5.241  | 90    | 90     | 90    |
| <i>P4</i> <sub>2</sub> <i>n</i> <i>mc</i> | 2  | $\bar{4}$ 2 <i>m</i> | -73.020    | 7.375  | 7.375  | 5.245  | 90    | 90     | 90    |
| <i>Pa</i> $\bar{3}$                       | 8  | 3                    | -71.672    | 10.455 | 10.455 | 10.455 | 90    | 90     | 90    |
| <i>P2</i> <sub>1</sub> / <i>c</i>         | 4  | 1                    | -71.575    | 9.604  | 6.366  | 9.581  | 90    | 100.59 | 90    |
| <i>P</i> $\bar{4}$ 3 <i>m</i>             | 1  | $\bar{4}$ 3 <i>m</i> | -71.244    | 5.236  | 5.236  | 5.236  | 90    | 90     | 90    |
| <i>P</i> $\bar{1}$                        | 2  | 1                    | -68.724    | 6.381  | 6.407  | 7.480  | 89.96 | 106.87 | 99.50 |
| <i>C2/c</i>                               | 32 | all on 1             | -65.620    | 21.938 | 11.522 | 21.505 | 90    | 117.31 | 90    |



**Table 16:** Calculated polymorphs for SnBr<sub>4</sub>

| Space group                               | Z  | Site sym.            | E/(kJ/mol) | a/Å    | b/Å    | c/Å    | α/° | β/°    | γ/° |
|-------------------------------------------|----|----------------------|------------|--------|--------|--------|-----|--------|-----|
| <i>C2/c</i>                               | 4  | 2                    | -81.706    | 11.971 | 5.310  | 10.671 | 90  | 116.41 | 90  |
| <i>I</i> $\bar{4}$ 2 <i>m</i>             | 2  | $\bar{4}$ 2 <i>m</i> | -81.292    | 5.344  | 5.344  | 5.344  | 90  | 90     | 90  |
| <i>Pa</i> $\bar{3}$                       | 8  | 3                    | -81.156    | 10.667 | 10.667 | 10.667 | 90  | 90     | 90  |
| <i>P4</i> <sub>2</sub> <i>n</i> <i>mc</i> | 2  | $\bar{4}$ 2 <i>m</i> | -81.078    | 7.593  | 7.593  | 5.280  | 90  | 90     | 90  |
| <i>P</i> $\bar{4}$ 3 <i>m</i>             | 1  | $\bar{4}$ 3 <i>m</i> | -80.104    | 5.366  | 5.366  | 5.366  | 90  | 90     | 90  |
| <i>P2</i> <sub>1</sub> / <i>c</i>         | 4  | 1                    | -80.104    | 9.806  | 6.517  | 9.756  | 90  | 100.62 | 90  |
| <i>C2/c</i>                               | 32 | all on 1             | -73.248    | 22.515 | 11.742 | 22.018 | 90  | 118.07 | 90  |

**Table 17:** Calculated polymorphs for SnI<sub>4</sub>

| Space group                       | Z  | Site sym.            | E/(kJ/mol) | a/Å    | b/Å    | c/Å    | α/° | β/°    | γ/° |
|-----------------------------------|----|----------------------|------------|--------|--------|--------|-----|--------|-----|
| <i>Pa</i> $\bar{3}$               | 8  | 3                    | -93.484    | 11.398 | 11.398 | 11.398 | 90  | 90     | 90  |
| <i>I2</i> <sub>1</sub> / <i>a</i> | 4  | 2                    | -92.956    | 11.427 | 5.655  | 12.885 | 90  | 116.46 | 90  |
| <i>P2</i> <sub>1</sub> / <i>c</i> | 4  | 1                    | -92.175    | 10.462 | 6.969  | 10.423 | 90  | 100.71 | 90  |
| <i>I</i> $\bar{4}$ 2 <i>m</i>     | 2  | $\bar{4}$ 2 <i>m</i> | -91.990    | 5.741  | 5.741  | 11.448 | 90  | 90     | 90  |
| <i>P2</i> <sub>1</sub> / <i>m</i> | 2  | m                    | -91.360    | 6.948  | 8.115  | 6.683  | 90  | 90     | 90  |
| <i>P</i> $\bar{4}$ 3 <i>m</i>     | 1  | $\bar{4}$ 3 <i>m</i> | -90.128    | 5.777  | 5.777  | 5.777  | 90  | 90     | 90  |
| <i>C2/c</i>                       | 32 | all on 1             | -84.456    | 24.110 | 12.445 | 23.701 | 90  | 118.87 | 90  |
| <i>R3c</i>                        | 6  | 1                    | -81.680    | 10.030 | 10.030 | 13.552 | 90  | 90     | 120 |

**Table 18:** Calculated polymorphs for PbF<sub>4</sub>

| Space group                       | Z  | Site sym.            | E/(kJ/mol) | a/Å    | b/Å   | c/Å    | α/° | β/°    | γ/° |
|-----------------------------------|----|----------------------|------------|--------|-------|--------|-----|--------|-----|
| <i>C2/c</i>                       | 4  | 2                    | -50.197    | 9.850  | 4.600 | 9.937  | 90  | 126.31 | 90  |
| <i>I</i> $\bar{4}$ 2 <i>m</i>     | 2  | $\bar{4}$ 2 <i>m</i> | -48.745    | 4.589  | 4.589 | 8.696  | 90  | 90     | 90  |
| <i>P2</i> <sub>1</sub> / <i>c</i> | 4  | 1                    | -46.691    | 8.301  | 5.388 | 8.419  | 90  | 98.93  | 90  |
| <i>Pa</i> $\bar{3}$               | 8  | 3                    | -44.671    | 9.048  | 9.048 | 9.048  | 90  | 90     | 90  |
| <i>C2/c</i>                       | 32 | all on 1             | -42.731    | 18.864 | 9.894 | 18.672 | 90  | 116.04 | 90  |
| <i>P</i> $\bar{4}$ 3 <i>m</i>     | 1  | $\bar{4}$ 3 <i>m</i> | -42.704    | 4.545  | 4.545 | 4.545  | 90  | 90     | 90  |

**Table 19:** Calculated polymorphs for PbCl<sub>4</sub>

| Space group                    | Z  | Site sym.   | E/(kJ/mol) | a/Å    | b/Å    | c/Å    | α/° | β/°    | γ/° |
|--------------------------------|----|-------------|------------|--------|--------|--------|-----|--------|-----|
| <i>C2/c</i>                    | 4  | 2           | -69.976    | 11.830 | 5.273  | 10.563 | 90  | 116.46 | 90  |
| <i>P42<sub>n</sub>mc</i>       | 2  | $\bar{4}2m$ | -69.609    | 7.500  | 7.500  | 5.256  | 90  | 90     | 90  |
| <i>I<math>\bar{4}2m</math></i> | 2  | $\bar{4}2m$ | -69.606    | 5.294  | 5.294  | 10.566 | 90  | 90     | 90  |
| <i>Pa<math>\bar{3}</math></i>  | 8  | 3           | -68.973    | 10.570 | 10.570 | 10.570 | 90  | 90     | 90  |
| <i>P2<sub>1</sub>/c</i>        | 4  | 1           | -68.337    | 9.718  | 6.450  | 9.673  | 90  | 100.57 | 90  |
| <i>P<math>\bar{4}3m</math></i> | 1  | $\bar{4}3m$ | -68.301    | 5.308  | 5.308  | 5.308  | 90  | 90     | 90  |
| <i>C2/c</i>                    | 32 | all on 1    | -62.481    | 22.286 | 11.634 | 21.829 | 90  | 117.89 | 90  |

**Table 20:** Calculated polymorphs for PbBr<sub>4</sub>

| Space group                    | Z  | Site sym.   | E/(kJ/mol) | a/Å    | b/Å    | c/Å    | α/°    | β/°    | γ/°   |
|--------------------------------|----|-------------|------------|--------|--------|--------|--------|--------|-------|
| <i>Pa<math>\bar{3}</math></i>  | 8  | 3           | -77.768    | 10.826 | 10.826 | 10.826 | 90     | 90     | 90    |
| <i>C2/c</i>                    | 4  | 2           | -77.625    | 12.213 | 5.369  | 10.851 | 90     | 116.27 | 90    |
| <i>P42<sub>n</sub>mc</i>       | 2  | $\bar{4}2m$ | -77.354    | 7.779  | 7.779  | 5.286  | 90     | 90     | 90    |
| <i>I<math>\bar{4}2m</math></i> | 2  | $\bar{4}2m$ | -76.713    | 5.453  | 5.453  | 10.875 | 90     | 90     | 90    |
| <i>P2<sub>1</sub>/c</i>        | 4  | 1           | -76.452    | 9.960  | 6.615  | 9.903  | 90     | 100.48 | 90    |
| <i>P<math>\bar{1}</math></i>   | 2  | 1           | -76.316    | 6.620  | 6.659  | 7.746  | 106.77 | 90.03  | 99.62 |
| <i>P<math>\bar{4}3m</math></i> | 1  | $\bar{4}3m$ | -74.794    | 5.489  | 5.489  | 5.489  | 90     | 90     | 90    |
| <i>C2/c</i>                    | 32 | all on 1    | -69.862    | 23.003 | 11.825 | 22.601 | 90     | 119.10 | 90    |

**Table 21:** Calculated polymorphs for PbI<sub>4</sub>

| Space group              | Z  | Site sym.   | E/(kJ/mol) | a/Å    | b/Å    | c/Å    | α/° | β/°    | γ/° |
|--------------------------|----|-------------|------------|--------|--------|--------|-----|--------|-----|
| <i>Pa</i> $\bar{3}$      | 8  | 3           | -90.733    | 11.551 | 11.551 | 11.551 | 90  | 90     | 90  |
| <i>C2/c</i>              | 4  | 2           | -89.752    | 13.057 | 5.736  | 11.590 | 90  | 115.94 | 90  |
| <i>P2<sub>1</sub>/c</i>  | 4  | 1           | -89.616    | 10.600 | 7.048  | 10.578 | 90  | 100.52 | 90  |
| <i>P4<sub>2n</sub>mc</i> | 2  | $\bar{4}2m$ | -89.458    | 8.383  | 8.383  | 5.557  | 90  | 90     | 90  |
| <i>P21/m</i>             | 2  | m           | -87.629    | 7.019  | 8.295  | 6.774  | 90  | 90     | 90  |
| <i>I</i> $\bar{4}2m$     | 2  | $\bar{4}2m$ | -87.212    | 5.872  | 5.872  | 11.553 | 90  | 90     | 90  |
| <i>P</i> $\bar{4}3m$     | 1  | $\bar{4}3m$ | -83.979    | 5.911  | 5.911  | 5.911  | 90  | 90     | 90  |
| <i>C2/c</i>              | 32 | all on 1    | -82.338    | 24.600 | 12.469 | 24.330 | 90  | 119.90 | 90  |
